1 **Immunomodulatory effects of extract of *Ganoderma lucidum* basidiocarps cultivated**  
2 **on alternative substrate**

3

4 **Running title: Immunopotential of alternatively cultivated *G. lucidum***

5

6 Biljana Božić Nedeljković<sup>1,2</sup>, Jasmina Čilerdžić<sup>2</sup>, Dragana Zmijanac<sup>1</sup>, Milan Marković<sup>1</sup>,  
7 Saša Vasilijić<sup>1,3</sup>, Mirjana Stajić<sup>2</sup>, Dragana Vučević<sup>1,3</sup>

8

9 <sup>1</sup>Institute for Medical Research, Military Medical Academy, Belgrade, Serbia.

10 <sup>2</sup>University of Belgrade, Faculty of Biology, Serbia.

11 <sup>3</sup>Faculty of Medicine of the Military Medical Academy, University of Defense in  
12 Belgrade, Serbia.

13

14

15

16 Corresponding author:

17 Dr. Biljana Božić Nedeljković, Full Professor

18 Institute of Physiology and Biochemistry “Ivan Djaja”, Faculty of Biology, University of  
19 Belgrade, Serbia

20 Studentski trg 16, 11000 Belgrade

21 Phone/Fax: +381 11 303 2356

22 E-mails: [biljana@bio.bg.ac.rs](mailto:biljana@bio.bg.ac.rs), [najbiljana@yahoo.com](mailto:najbiljana@yahoo.com)

23

24 **Abstract**

25 *Background:* *Ganoderma lucidum* is a medicinal mushroom exhibiting numerous health  
26 benefits primarily based on strong immunostimulatory effects. The aim of the study was  
27 to investigate if there were differences in effects of extracts of commercially (GC) and  
28 alternatively (wheat straw) (GA) cultivated *G. lucidum* basidiocarps on properties of  
29 peritoneal macrophages (PM) and monocyte-derived dendritic cells (MoDCs).

30 *Methods:* Differences in immunomodulatory effects of GC/GA extracts were studied.  
31 Viability of treated PMs, their adhesive and phagocytic capability and capacity to produce  
32 reactive oxygen species (ROS) and NO was tested. Immature MoDCs generated from  
33 human monocytes were treated with poly I:C (10.0 µg/ml) and loxoribine (34.0 µg/ml), a  
34 selective TLR3 and TLR7 agonists, respectively, and with/without GC/GA extract (100.0  
35 µg/ml). The effect of each combination on phenotypic properties, cytokines production by  
36 MoDCs, and their proliferation and Th polarizing capacity was studied.

37 *Results:* GA extract stronger stimulated metabolic and phagocytic activity of PMs, their  
38 adhesion capability and ability to produce ROS and NO compared to GC. Both tested  
39 extracts significantly increased allostimulatory and Th1 polarization capacity of  
40 simultaneous TLR3 and TLR7-activated MoDCs, but GA extract was more effective.

41 *Discussion:* The extract of alternatively cultivated *G. lucidum* basidiocarps increased  
42 production of ROS and NO by TLR4 stimulated PMs and up-regulated production of  
43 certain cytokines as well as allostimulatory and Th1 polarization capacity of MoDCs. GA  
44 extract could be a potent immunostimulatory agent for activation of MoDCs with  
45 simultaneous engagement of TLRs that seems to be a promising strategy for preparation  
46 of DC-based anti-tumor vaccines.

47

48 *Keywords:* Macrophages; Dendritic cells; *Ganoderma lucidum*; Wheat straw  
49 Immunomodulators.

50

## 51 **Introduction**

52

53 *Ganoderma lucidum* (Curtis) P. Karst., known as Reishi, is a popular medicinal  
54 mushroom used in traditional medicine for the prevention and treatment of various  
55 pathological conditions. Today, there is evidence that bioactive constituents of this  
56 species are responsible for numerous health benefits due to strong immunomodulatory,  
57 antitumor, antioxidative, anti-inflammatory, antimicrobial and many other activities (Lin  
58 et al., 2006a; Yuen et al., 2008; Wasser, 2010; Joseph et al., 2011). Therefore,  
59 commercial production of this mushroom is continuously growing and nowadays  
60 emphasis is put on creation of system for cheaper, easier, faster and environmental  
61 friendly cultivation of biologically more active fruiting bodies. Thus, fruiting bodies with  
62 higher immunostimulatory potential could be applied as natural pharmaceutical agents in  
63 immunotherapy of primarily patients suffering from various tumor types (Park et al.,  
64 2018).

65 The antigen-presenting cells (APCs) are common checkpoint for stimulation of  
66 immune system and induction of potent antitumor response in cancer treatment (Martin et  
67 al., 2015). They include dendritic cells (DCs), macrophages and B lymphocytes, which  
68 participate in capturing, processing and presenting antigens to T lymphocytes (Flaherty,  
69 2012). Macrophages and DCs are the powerful phagocytic cells, key players in the innate  
70 immune system and link between innate and adaptive immunity, which are derived from  
71 peripheral blood monocytes and exist in almost all tissues (Clark et al., 2000; Hirayama et  
72 al., 2018). Activated macrophages produce numerous bioactive compounds, including  
73 reactive oxygen species (ROS), nitric oxide (NO), an important mediator of innate  
74 immune response on various pathological stages, as well as cytokines, primarily  
75 interleukins (IL-1, IL-6), tumor necrosis factor  $\alpha$  (TNF- $\alpha$ ), and interferon- $\gamma$  (IFN- $\gamma$ ),  
76 which are crucial in recruitment and activation of other immune cells and stimulation of  
77 adaptive immunity (Hirayama et al., 2018). In the presence of microbes or inflammatory  
78 stimuli, DCs undergo a complex process of maturation that includes up-regulation of co-  
79 stimulatory molecules, migration to lymph nodes, T lymphocytes priming and cytokine  
80 production (Clark et al., 2000). These potent APCs express various pattern recognition

81 receptors (PRRs) and in such a way trigger signaling pathways resulting in their  
82 phenotypic changes and functional maturation (Martin et al., 2015). Toll-like receptors  
83 (TLRs) present an important group of PRRs on the macrophages and DCs surface and  
84 crucial factors for recognition of viruses, bacteria, fungi, and parasites, i.e. they play a key  
85 role in innate immunity (Kawai and Akira, 2009). These authors emphasized that ligation  
86 of different TLRs by specific TLR agonists presents a powerful tool for induction of DCs  
87 maturation. TLR agonists are used as adjuvants or immune modifiers in DC-based trials  
88 of tumor immunotherapy) (Bhardwaj et al., 2010). However, since single TLR agonist has  
89 relatively limited adjuvant effects on DC phenotype and function, current studies are  
90 focused on research of synergy between paired TLR agonists (Yheng et al., 2008).

91 Starting from the fact emphasized by Pi and colleagues (Pi et al., 2014) that  
92 polysaccharides of *Ganoderma* spp. possess strong immunostimulatory activity based on  
93 their recognition as foreign molecules by various PRRs on DCs, and consequently on  
94 stimulation of APCs maturation, the aim of this study was defined. In our study we  
95 investigated the potential synergism of extracts of commercially (GC) and alternatively  
96 (wheat straw) (GA) cultivated *G. lucidum* basidiocarps with different TLRs on different  
97 APCs. Namely, we investigated the immunomodulatory effects of GC and GA extracts on  
98 functional properties of peritoneal macrophages stimulated by TLR4 and on functional  
99 characteristics of human monocyte-derived dendritic cells stimulated by simultaneous  
100 engagement of TLR3 and TLR7.

101

## 102 **Materials and methods**

### 103 *Organism and growth conditions*

104 The culture of *Ganoderma lucidum* BEOFB 431, isolated from fruiting body collected  
105 in Bojčin forest (Belgrade, Serbia), is maintained on Malt agar medium in the culture  
106 collection of the Institute of Botany, Faculty of Biology, University of Belgrade. The  
107 fruiting bodies were cultivated on alternative substrate consisted of wheat straw under  
108 laboratory conditions (Ćilerdžić et al., 2018a). Basidiocarps of a commercial Chinese  
109 strain, cultivated on oak sawdust, were purchased at a health food store.

110

111 *Preparation of the basidiocarp extracts*

112 The dried and pulverized commercially and alternatively produced *G. lucidum*  
113 basidiocarps (2.0 g) were extracted with 60.0 mL of 96% ethanol by stirring on a  
114 magnetic stirrer (150 rpm) for 72 h. The resultant extracts were centrifuged (20 °C, 3000  
115 rpm, 10 min) and supernatants were filtered through Whatman No.4 filter paper,  
116 concentrated under reduced pressure in a rotary evaporator (Büchi, Rotavapor R-114,  
117 Germany) at 40 °C to dryness, and redissolved in 5% dimethyl sulphoxide (DMSO) to an  
118 initial concentration of 10.0 mg/mL.

119

120 *Experimental animals*

121 All animal experiments were approved by the Ethics Review Committee for Animal  
122 Experimentation of Military Medical Academy and Ministry of Agriculture and  
123 Environmental Protection of Republic of Serbia (Veterinary Directorate No. 323-07-  
124 7363/2014-05/5). Inbred male Albino Oxford rats (AO; Vivarium for Small Experimental  
125 Animals, Military Medical Academy, Belgrade) weighting about 200-220 g were housed  
126 in an air-conditioned room at 25 °C on a 12h-light/dark cycle. Animals were provided  
127 pelleted food (Veterinary Institute, Subotica) and tap water *ad libitum*. Sacrifice was done  
128 with intravenous injection of Ketamin/Xilazyn in a lethal dose. All procedures were done  
129 in accordance with the Guide for the care and use of laboratory animals.

130

131 *Peritoneal macrophages isolation and experimental design*

132 The medium used for the cell isolation and incubation was HEPES-buffered Roswell  
133 Park Memorial Institute medium (RPMI-1640) supplemented with fetal calf serum (FCS)  
134 (Flow, Irvine, Ca, USA), glutamine (ICN Flow, SAD), penicillin, and gentamicin  
135 (Galenika a.d.d., Serbia). Peritoneal cells were obtained by sterile lavage with RPMI  
136 medium supplemented with 2% FCS and heparin (Galenika a.d.d., Serbia). Enrichment of  
137 peritoneal cell exudates with PMs was enabled using density gradient OPTIPREP  
138 (Nycomed Pharmas, Norway) with 0.8% NaCl. After centrifugation on gradient,  
139 mononuclear cells (highly enriched with PM, >90%) were washed and resuspended in  
140 RPMI-1640 supplemented with 10% FCS and cell number was adjusted to 10<sup>6</sup> cells/mL.

141 Afterward, the cells were seeded in 96-well plate in two ways: *i*)  $1 \times 10^5$  cells per well for  
142 testing the viability and production of phagocytic activity, ROS, NO and cytokine and *ii*)  
143  $5 \times 10^5$  cells per well for assessment of adhesion capacity and.

144 Peritoneal macrophages (PMs) isolated in this way were cultivated under standard  
145 conditions (37 °C, 5% CO<sub>2</sub>) for 24 h, and treated with GC and GA extracts in final  
146 concentration of 100.0, 10.0 and 0.1 µg/ml per well in presence or absence of adequate  
147 stimulator (in dependence of evaluated function). Lipopolysaccharide (LPS, Sigma,  
148 USA), TLR4 agonist, at final concentration of 100.0 ng/mL per well, was used as a  
149 stimulator for assessment of metabolic viability, phagocytic activity, and NO production.  
150 Adhesion capacity and ROS production were assessed by phorbol-myristate-acetate  
151 (PMA, Sigma, USA) at the final concentration of 250.0 ng/mL per well. Control cells  
152 were cultivated under standard conditions, with or without TLR4 agonist and were not  
153 treated with GC and GA extracts. All studied functions of PMs were observed after 24 h  
154 cultivation *in vitro* and were done in quadruplicate.

155

#### 156 *Cell viability assay*

157 Cell viability was estimated by a quantitative colorimetric assay described for human  
158 granulocytes which was based on metabolic reduction of 3-(4,5-dimethylthiazol-2-yl)-  
159 2,5-diphenyltetrazolium bromide (MTT, Invitrogen) into colored product formazan (Oez  
160 et al., 1990a). MTT assay was conducted with 24 h cultivated PMs and MTT which was  
161 added in the concentration of 5.0 mg/mL (10.0 µL per well), which were incubated at 37  
162 °C in an atmosphere of 5% CO<sub>2</sub> and 95% humidity for 3 h. The absorbance of produced  
163 formazan after overnight incubation in the solution composed of sodium dodecyl sulphate  
164 (SDS) and HCl (10% SDS with 0.01 N HCl) was measured at dual wavelengths, 570/650  
165 nm by an ELISA 96-well plate reader (Behringer, Germany). Cells viability was  
166 expressed as absorbance of solubilized formazan at the end of incubation period.

167

#### 168 *Phagocytosis assay*

169 Phagocytic capacity of PMs was determined according to the technique described by  
170 Chen and colleagues (Chen et al., 2015). After 24 h cultivation PMs without/with

171 stimulators and GC/GA extract, the supernatants were collected and 50µl /well of neutral  
172 red (1:300) was added and incubated for 4 h. After incubation, supernatants were  
173 discarded, cells were washed with phosphate-buffered saline (PBS) three times and lysed  
174 by adding 100.0 µL/well of cell lysing solution (ethanol and 1% acetic acid at the ratio of  
175 1:1), and absorbance of the solution was measured at 540/650 nm using Microplate  
176 Reader (Behringer, Germany).

177

#### 178 *Adhesion capacity assay*

179 Adhesion capacity of PMs was assessed by a method of Oez and colleagues (Oez et  
180 al., 1990b) based on the cell ability to adhere to plastic matrix. After the 24 h cultivation  
181 without/with stimulators and GC/GA extract, supernatants were removed and cells were  
182 washed three times with warm PBS in order to remove non-adhered cells. Then in the  
183 each well added methanol (100.0 µL/well) and it was incubated for 7 minutes. Attached  
184 cells were dyed with 0.1% solution of methyl blue (100.0 µL/well) for 15 minutes and  
185 washed three times with tap water. Plates were left to dry on air over night and color was  
186 dissolved by adding 0.1 N HCl (200.0 µL/well). Absorbance of the solution in the each  
187 well was measured at 650/570 nm using Microplate Reader (Behringer, Germany).

#### 188 *NBT reduction assay*

189 NBT assay was used to evaluate generation of superoxide anion ( $O_2^-$ ) produced by  
190 PMs (Pick et al., 1981). Briefly, nitroblue tetrazolium (NBT, Invitrogen), in final  
191 concentration of 0.5 mg/mL per well, was added to PMs suspension after 24 h treatment  
192 of PMs without/with stimulators and GC/GA extracts and the mixture was incubated at  
193 37 °C in an atmosphere of 5% CO<sub>2</sub> and 95% humidity for one hour. Formed diformazan  
194 crystals were dissolved by adding SDS-HCl mixture (100.0 µL/well) and optical density  
195 was measured at 570/650 nm by Microplate reader (Behringer, Germany).

196

#### 197 *Determination of NO production*

198 Production of NO was quantified by the accumulation of nitrite as a stable end-product  
199 and determined by a Griess reaction assay (Green et al., 1982). Equal volumes of the  
200 supernatans and Griess reagent [0.35% 4-aminophenyl sulfone (Sigma-Aldrich,



201 Germany), 0.1% N-(1-naphthyl)ethylenediamine dihydrochloride in 1M HCl (POCh,  
202 Poland)] were incubated at room temperature ( $22 \pm 2$  °C) for 10 minutes. Optical density  
203 of solution was measured at 540/650 nm using Microplate Reader (Behringer, Germany).  
204 The nitrite concentration ( $\mu\text{M}$ ) was calculated from the prepared standard curve for the  
205 known  $\text{NaNO}_2$  concentrations.

206

#### 207 *Preparation and treatment of human monocyte-derived dendritic cells*

208 Immature monocyte-derived dendritic cells (MoDCs) were generated from adherent  
209 fraction of human peripheral blood mononuclear cells (PBMCs). Namely, PBMCs from  
210 buffy coats of healthy volunteers (upon written an informed consent) were isolated by  
211 density centrifugation in Lymphoprep (Nycomed, Oslo, Norway), re-suspended in 5.0 mL  
212 of 10% FCS with 2-Mercaptoethanol (2-ME) in RPMI medium and allowed to adhere to  
213 plastic flasks. After incubation at 37 °C for 90 minutes, non-adhered cells were removed  
214 and adhered cells were cultured in 5.0 mL of RPMI medium containing granulocyte-  
215 macrophage colony-stimulating factor (GM-CSF; 100.0 ng/mL) and IL-4 (20.0 ng/mL).  
216 On day three, a half of medium volume was removed and replaced with the same volume  
217 of fresh medium containing GM-CSF and IL-4 and it was incubated for next two days. At  
218 the end of incubation period (on day 5), MoDCs ( $5 \times 10^5$  cells/well) were moved in 24-  
219 well plate, in RPMI medium containing GM-CSF/IL4. After six days, immature MoDCs  
220 were replated ( $5 \times 10^5$  cells/ml) in medium with different combination of TLR3 agonist  
221 (Poly (I:C), Sigma-Aldrich, Germany, 10.0  $\mu\text{g}/\text{mL}$ ) and TLR7 agonist (Loxoribine  
222 Sigma-Aldrich, Germany, 34.0  $\mu\text{g}/\text{mL}$ ) with GC and GA extracts (100.0  $\mu\text{g}/\text{mL}$ ), and  
223 incubated for 24 h. Afterwards, cell-free supernatants were collected for cytokine  
224 analysis, while cells were detached and their phenotype was observed. Cell-free  
225 supernatants were collected and stored at  $-20$  °C for the subsequent determination of  
226 cytokine levels. The cells were used for further studies.

227

#### 228 *Flow cytometry analysis of MoDCs for immunophenotyping*

229 Control and treated MoDCs ( $2 \times 10^5$  cells/tube) were washed in PBS supplemented  
230 with 2% FCS and 0.1%  $\text{NaN}_3$ , and incubated at 4 °C for 45 min with one of the following



231 monoclonal antibodies (mAbs): HLA-DR coupled with phycoerythrin (PE), CD83  
232 conjugated with fluorescein isothiocyanate (FITC), CD86-PE, CD40-FITC, CD54-PE  
233 (Serotec, Oxford, UK), and CCR7-FITC (R&D Systems, Minneapolis, MN, USA). The  
234 control MoDCs incubated with irrelevant mouse Mab reactive with rat antigens were used  
235 as the irrelevant control. The cells were incubated at 4 °C for 45 min, washed and fixed  
236 with 1% paraformaldehyde. For cell fluorescence analysis, at least  $5 \times 10^3$  cells per sample  
237 were analyzed using EPICS XL-MCL flow cytometer (Coulter, Krefeld, Germany). Cell-  
238 surface expression on MoDCs was determined by means of a forward versus side scatter  
239 gate.

240

#### 241 *Mixed leukocyte reaction with allogeneic CD4<sup>+</sup> T lymphocytes*

242 Conventional CD4<sup>+</sup> T lymphocytes were isolated from PBMCs using negative  
243 immunomagnetic sorting with CD4<sup>+</sup> T lymphocytes isolation MACS kit (Myltenyi  
244 Biotec, Germany). According to flow cytometry analysis, purity of isolated CD4<sup>+</sup> T  
245 lymphocytes was higher than 95%. Purified allogeneic CD4<sup>+</sup> T lymphocytes ( $10^5$   
246 cells/well) were placed in 96-well plates and cultivated with MoDCs pre-treated with  
247 TLR agonists and *G. lucidum* extracts in RPMI medium with 10% FCS. Cell proliferation  
248 was detected after five days of cultivation. Cells were pulsed with [<sup>3</sup>H] thymidine (1.0  
249 μCi/well; Amersham, UK) for the last 18 h of cultivation, then harvested onto glass fiber  
250 filters, and [<sup>3</sup>H] thymidine incorporation into DNA was measured by β-scintillation  
251 counting (LKB-1219; Rackbeta, Finland). Results were expressed as counts per minute  
252 (c.p.m.).

253

#### 254 *Evaluation of cytokine production*

255 The levels of TNF-α, IL-12, IL-6, and IL-10 were measured in the cell-free  
256 supernatants of control and treated MoDCs cultures ( $4 \times 10^5$  cells/mL) by ELISA assays  
257 (R&D Systems, Minneapolis, USA). The levels of cytokines produced by CD4<sup>+</sup> T  
258 lymphocytes in co-cultures with MoDCs were evaluated in the cell-free supernatants of  
259 co-cultures. Briefly, purified allogeneic CD4<sup>+</sup> T cells ( $1 \times 10^5$  cells/well) were cultivated  
260 with MoDCs ( $1 \times 10^4$  cells/well) pre-treated with TLR agonists and *G. lucidum* extracts in

261 RPMI medium with 10% FCS in 96-well plates. Phorbol-myristate-acetate (20.0 ng/mL)  
262 and ionomycin (500.0 ng/mL) (Merck, Austria) were added to the wells after five days.  
263 Cells were incubated for an additional 8 h and then harvested, and cell-free supernatants  
264 were collected after centrifugation and stored at -20 °C for the subsequent determination  
265 of the studied cytokine levels.

266

### 267 *Statistical analysis*

268 All measurements were done in quadruplicates in double experiments and obtained  
269 results were reported as mean  $\pm$  standard error. Data were analyzed for significant  
270 differences using Student's paired *t*-test. A *p* value less than 0.05 was considered to be  
271 statistically significant.

272

## 273 **Results**

274

### 275 *Effect of Ganoderma lucidum extracts on metabolic activity/viability of PMs*

276 The extracts of commercially and alternatively cultivated *G. lucidum* basidiocarps (GC  
277 and GA, respectively) have no effect on metabolic activity/viability of non-stimulated  
278 PMs, except GC extract in concentration of 100.0  $\mu$ g/mL which affected inhibitory (Fig.  
279 1A). However, the all tested extracts (except GC in a concentration of 100.0  $\mu$ g/mL)  
280 showed stimulatory effect on metabolic activity/viability of LPS-stimulated PMs.  
281 Furthermore, in comparison with GC, GA has the stronger effect in concentration 10  
282 ug/ml and 100 ug/ml.

283

### 284 *Effect of Ganoderma lucidum extracts on adhesive capability and phagocytic activity of* 285 *PMs*

286 Effect of *G. lucidum* extracts cultivated on different substrates (commercially and  
287 alternatively) on adhesion capacity of non-stimulated and PMA-stimulated PMs are  
288 shown on Fig. 2. Treatment of non-stimulated PMs with GC extract did not modulate  
289 their adhesive capability, while treatment with GA extract, in all tested concentrations,  
290 enhanced their adhesive function compared to ability of non-treated and GC treated PMs

291 (Fig. 2A). Comparing with a control, GC extract had no effect on adhesive capacity of  
292 PMA-stimulated PMs, while GA extract (in all tested concentrations) enhanced this  
293 ability (Fig. 2B).

294 GC and GA extracts showed no significant effect on phagocytic function of non-  
295 stimulated PMs (data not shown). However, in the case of LPS-stimulated PMs, GA  
296 extract (in all tested concentrations) statistically considerable up-regulated this activity in  
297 comparison with non-treated PMs and PMs treated with GC extract (Fig. 3).

298

#### 299 *Effect of Ganoderma lucidum extracts on ROS and NO production by PMs*

300 The treatment of non-stimulated PMs with GC and GA extracts no affected their  
301 potential of ROS production (data not shown). Comparing with adequate control cells,  
302 GC extract had no effect on ROS production by LPS-stimulated PMs, contrary to GA  
303 extract which statistically significant increased this ability (Fig. 4).

304 Treatment of non-stimulated and LPS-stimulated PMs with GC and GA extracts, in all  
305 tested concentrations (except treatment of non-stimulated cells with 100.0 µg/mL of GC  
306 extract) caused increase of NO production. Furthermore, GA extract was statistically  
307 stronger inducer of NO production by tested PMs than GC extract (Fig. 5).

308

#### 309 *Effect of Ganoderma lucidum extracts on phenotype and cytokine production by MoDCs*

310 Phenotype analysis showed that GC and GA extracts did not affect MoDCs phenotype  
311 measured by percent of HLA-DR, CD83, CD86, CD40, and CCR7 positive cells (data not  
312 shown). Simultaneous treatment of MoDCs with treatment with Poly (I:C), Loxoribine  
313 and GC or GA extracts up-regulated mean of fluorescence (MnI) of CD83 and HLA-DR.  
314 Additionally, thus simultaneous treatment of TLR 3 and TLR 7-stimulated MoDCs with  
315 GA extract also affected the expression of co-stimulatory molecules, CD86 and CD40, as  
316 well as chemokine receptor, CCR7 (Fig. 6A).

317 The additions of GC extract stimulated production of IL-6 and TNF- $\alpha$ , had no effect  
318 on production of IL-12, and inhibited the production of IL-10 by TLR3 and 7-stimulated  
319 MoDCs. On the other hand, GA extract inhibited the production of IL-6 and IL-10 and

320 had no effect on TNF- $\alpha$  and IL-12 production by studied MoDCs compared to MoDC  
321 treated only with TLR3 and TLR7 antagonist (Fig. 6B).

322

323 *Effect of Ganoderma lucidum extracts on alostimulatory and Th cells polarization*  
324 *capacity of MoDCs*

325 Ability of TLR3 and TLR7-stimulated MoDCs to induce the proliferation of allogenic  
326 CD4<sup>+</sup> T lymphocytes was not changed by addition of GC extract, while GA extract  
327 significantly enhanced this ability (Fig. 7A). MoDCs treated with TLR3 and TLR7  
328 agonists and with GC extract down-regulated production of IFN- $\gamma$  and had no effect on  
329 IL-17 production by allogenic CD4<sup>+</sup> T lymphocytes compared to effect of MoDCs treated  
330 only with TLR3 and TLR7 agonists. On the other side, GA extract in combination with  
331 TLR3 and TLR7 changed the properties of MoDCs and thus stimulated MoDCs up-  
332 regulated IFN- $\gamma$  synthesis and had no effect on IL-17 generation by allogenic CD4<sup>+</sup> T  
333 lymphocytes in comparison with TLR3 and TLR7-stimulated MoDCs (Fig. 7B).  
334 Additionally, GA extract in combination with TLR3 and TLR7 up-regulated IL-17  
335 synthesis by allogenic CD4<sup>+</sup> T lymphocytes in comparison with GC, TLR3 and TLR7-  
336 stimulated MoDCs (Fig. 7B).

337

## 338 **Discussion**

339 Cooperation of different PRR signals in APC during the induction of immune  
340 responses is an emerging field in innate immune research. Activation of two or more  
341 TLRs, or other PRRs at the same time, which mimic the actual situation during host cell-  
342 microbe interaction, may lead to synergistic, antagonistic, or additive effects (Mäkelä et  
343 al., 2009). On the other side, *Ganoderma* spp. extracts and metabolites (derived from  
344 wild and/or traditionally cultivated basidiocarps) express strong immunomodulatory  
345 characteristics and present an effective modifiers of different biological processes (Lin et  
346 al., 2006b; Boh, 2013; Shi et al., 2013; Liu et al., 2016a,b). According to available  
347 literature, there is no knowledge about the immunomodulatory potential of crude extracts  
348 of *G. lucidum* basidiocarps cultivated on any alternative and environmentally friendly  
349 substrate. This is the first report on it and our findings showed that crude extract of *G.*

350 *lucidum* basidiocarps cultivated on nutritionally poor wheat straw contained molecules  
351 with higher immunomodulatory potentials that in cooperation with agonists of different  
352 TLRs induced significantly better activation of APCs compared to effect of TLRs alone.  
353 Thus, the GA extract expresses better immunostimulatory potential in cooperation with  
354 TLR4 agonist in up-regulation of PMs functional characteristics compared to GC extract  
355 as well as induction of better allostimulatory and Th1 polarization capacity of MoDCs  
356 treated in cooperation with TLR3 and TLR7 antagonists. Therefore, extract of  
357 alternatively obtained basidiocarps could be an effective additional agent during  
358 simultaneous engagements of different TLRs on APCs for *in vitro* preparation of APCs as  
359 tool for anti-tumor therapy.

360 Today, it is well known that fungi possess potential for production of high diversity  
361 low molecular weight products (secondary metabolites) with various biological activities  
362 that are mainly important for their interactions with other organisms (Brakhage and  
363 Schroeckh, 2011). These secondary metabolites are present in a small amount and their  
364 composition/combination depends on the type of substrate on which they are cultivated. It  
365 may be a reason for different immunomodulatory effects of GC and GA extracts noted in  
366 this study. The literature data and data of this study indicate that the study of the *in vitro*  
367 cultivation conditions that could possibly optimize their production seems of major  
368 importance. Another very important fact in recent modern period is the need to find a  
369 cost-effective and environmental friendly alternative substrate for *G. lucidum* cultivation  
370 which classically was grown on sawdust of sheesham, mango, and poplar.

371 The genus *Ganoderma* (especially *G. lucidum*), has been used since ancient times in  
372 Eastern traditional medicine. In recent years, the precise effect and their mechanisms  
373 were investigated and *G. lucidum* in modern days is used in the treatment and prevention  
374 of various pathological conditions. The numerous studies have already demonstrated that  
375 various *Ganoderma* spp. extracts and metabolites possess strong immunostimulatory  
376 activity and present effective modifiers of some biological response (Lin et al., 2006b;  
377 Boh, 2013; Shi et al., 2013; Liu et al., 2016a,b). Also, Pi et al. (2014) and Lin et al.  
378 (2006b) noted remarkable activation of Th1 and Th2 cells and certain cytokines synthesis  
379 in mice treated with *G. tsugae* hot water extract and *G. formosanum* polysaccharide

380 fraction. Similarly, *G. lucidum* polysaccharide, besides effective stimulation of Th1/Th2  
381 immune response, caused stronger proliferation of murine macrophages and significantly  
382 higher synthesis of NO as well as IFN- $\gamma$ , TNF- $\alpha$ , IL-4 and IL-6 in comparison with the  
383 control group (Shi et al., 2013; Liu et al., 2016a,b).

384 Regarding to the crucial role of macrophages during establishing and maintaining  
385 homeostasis and defending against pathogens and transformed cells, these cells are  
386 involved in pathogenesis in many diseases (Jung et al., 2015; Ampem et al., 2016; Da  
387 Silva and Barton, 2016). In response to differences in soluble characteristics of  
388 microenvironment and different signals from microorganism-associated molecular  
389 patterns, macrophages can polarize into pro-inflammatory, M1, or anti-inflammatory, M2,  
390 phenotype (Lawrence and Natoli, 2011; Murray and Wynn, 2011). *In vitro* cultivation of  
391 PMs from mice/rats represents an exceptionally powerful technique to investigate  
392 macrophage functions in response to different stimuli, resembling as much as possible the  
393 conditions observed in various pathophysiological conditions or as potential therapeutic  
394 agents. Thus, glucan isolated from *G. lucidum* spores has also stimulated cytokine  
395 production by PMs in culture (Guo et al., 2009). The considerable immunostimulatory  
396 effect was also exhibited by *G. atrum* polysaccharide as well as its acetylated form, which  
397 caused increased viability of T lymphocytes and level of IL-2 and TNF- $\alpha$  in serum of  
398 immunosuppressive mice treated with cyclophosphamide overdoses, by regulation of  
399 ROS production and NF- $\kappa$ B activity (Chen et al., 2014; Yu et al., 2014; Li et al., 2017). In  
400 this study, the immunomodulatory potential of GC and GA extracts was evaluated on  
401 PMs with or without TLR4 cooperation (LPS). Macrophages stimulated with LPS are  
402 termed as classical activation macrophages (M1 macrophages) and they are involved in  
403 the inflammation, pathogen clearance, and anti-tumor immunity (Shapouri-Moghaddam  
404 et al., 2018; Atri et al., 2018). Results of this study show that GC extract with LPS as  
405 TLR4 agonist expressed potential for stimulation of metabolic activity/viability of PMs  
406 and stimulation of NO production by PMs, while do not express potential for modulation  
407 of adhesive and phagocytic potential and ROS production by PMs. On the other hand, GA  
408 extract in combination with TLR4 signals induced by LPS induce intensive stimulation of  
409 all investigated functions of PMs including metabolic activity, phagocytic capacity, and

410 production of ROS and NO compared to effect of GC. Additionally, GA increased  
411 adhesive capacity of PMA-stimulated PMs. These results may indicate that GA extract  
412 with TLR4 agonist induce stronger signaling that is responsible for stimulation of very  
413 significant characteristics of M1 macrophages such as their metabolic activity, phagocytic  
414 activity, ROS and NO production compared to TLR4 signaling alone. Also, adhesive  
415 capacity of PMA-stimulated PMs was additionally increased by GA extracts. A few  
416 studies demonstrated mechanism of mushroom polysaccharides action on cytokine  
417 production. Namely, Kim et al. (2012) and Pi et al. (2014) showed that augmentation of  
418 TNF- $\alpha$  synthesis by macrophages was based on the polysaccharide binding for TLR4  
419 sited on macrophage membrane and its recognition as pathogen-associated molecular  
420 patterns. However, detailed analyses demonstrated that induction of mRNA expression in  
421 Sarcoma 180-bearing mice is the main mechanism of the polysaccharide action (Huang et  
422 al., 2016). Since these studies demonstrated that intracellularly generated ROS (as a  
423 response to pathological stimuli) affect NF- $\kappa$ B activation and in a such way cytokine  
424 production by macrophages, it can be concluded that ethanol extract of alternatively  
425 cultivated *G. lucidum* basidiocarps which significantly increased ROS production in PMs,  
426 could be a potent immunostimulatory and anti-tumor agent.

427 Induction of effective adaptive immune responses depends on signals from innate  
428 immunity especially from level of maturation of DCs and their characteristics (Abbas et  
429 al., 2017). In our study, the combination of poly I:C, loxoribine and GC/GA extract  
430 induced phenotypic maturation of MoDCs as determined by up-regulating the surface  
431 molecules, including HLA-DR and CD83. CD83 acts as a key DC maturation marker  
432 (Prechtel et al., 2007). However, combination of poly I:C, loxoribine and GA extract  
433 induced up-regulation of CD86, CD40 and CCR7. CD86 is a main co-stimulatory ligand  
434 for T cells, providing the second signal for proliferation and clone expansion of antigen-  
435 specific T cells (Jeannin et al., 2000). CD40 is also an indicator of activation state of  
436 MoDCs whose up-regulation acts in favor of enhanced T cell activation (Sheikh and  
437 Jones, 2008). Interaction of this molecule with its ligand (CD40L), expressed by activated  
438 T cells is important for up-regulation of co-stimulatory molecules on DCs and enhanced  
439 capacity of DCs to trigger proliferative responses and for regulation of DC functions



440 (Cella et al., 1999). It is in line with our results which showed significantly higher  
441 proliferation of CD4 T lymphocytes co-cultivated with MoDC treated with combination  
442 of poly I:C, loxoribine and GA extract. It is important to mention that solely maturation  
443 of DCs, expressing high levels of co-stimulatory and maturation markers, is not sufficient  
444 for an adequate immune response. Namely, various cytokine production and subsequent  
445 CD4<sup>+</sup> T lymphocytes polarization by DCs is of great significance in the induction of  
446 proper immune response as well (Zobywalski et al., 2007). Poly I:C is known as a potent  
447 stimulator of bioactive IL-12 production and subsequent activator of the Th1 immune  
448 response (Rouas et al., 2004). Our findings confirm these published results because Poly  
449 I:C in combination with loxoribine and GC/GA extract induces the up-regulation of IL-12  
450 level. Important finding of this study was the intensive promotion of Th1 and slightly  
451 promotion of Th17 polarizing capability of MoDCs by simultaneous engagement of poly  
452 I:C, loxoribine and GA compared to capability of MoDCs by simultaneous engagement  
453 of poly I:C, loxoribine and GC. Regarding IL-10 production, obtained results are also  
454 interesting. Namely, IL-10 is an immunoregulatory cytokine, responsible for tolerogenic  
455 properties of DCs (Smits et al., 2005), which participates in balancing of immune  
456 response (Saraiva et al., 2009). Production of IL-10 could be relevant as a down-regulator  
457 of an extensive production of immunostimulatory cytokines, knowing that the balance  
458 between stimulatory and inhibitory cytokines is important for critical point during  
459 immune response. The decreased level of IL-10, in co-culture of CD4<sup>+</sup> T lymphocytes  
460 and MoDCs treated simultaneous with poly I:C and loxoribine and GC/GA, could be  
461 explained by mutual antagonistic effects of Th1 cells on Th2 cells and Tregs as showed  
462 by Glimcher and Murphy (2000) [49]. Therefore, down-regulation of IL-10 production  
463 may serve as an additional mechanism for promotion of the Th1 immune response.

464 Bearing in mind the significance of anti-tumor vaccines, this study performed to find  
465 optimal protocol for development of DCs able to induce adequate immune response. The  
466 results that we obtained in this study suggest that simultaneous TLR3 and TLR7 signaling  
467 with signaling induced by components of crude extract of *G. lucidum* cultivated on wheat  
468 straw may provide a previously un-described approach for DC-based vaccine  
469 development by using synergistic TLR ligands and *G. lucidum* extract. Overall, these

470 results point to that natural immunomodulators possible mechanism for enhancement of  
471 effects of known TLR agonists.

472

### 473 **Conclusion**

474 The importance of the presented results can be realized by taking into account several  
475 facts: (i) immunomodulatory activity is known only for wild and traditionally cultivated  
476 *G. lucidum* basidiocarps; (ii) traditional cultivation of *G. lucidum* basidiocarps on various  
477 hardwood sawdusts is not ecologically and economically friendly; (iii) substrate  
478 composition and cultivation conditions significantly affected type and content of  
479 bioactive metabolites and their activities [50]; (iv) wheat straw induced a synthesis of  
480 numerous bioactive molecules, primarily triterpenoids (Ćilardžić et al., 2018b), which  
481 could be considered as the one of strong modulators of APCs activity; (v) there is  
482 increasing need for natural immunomodulators, without any side effect; (vi) modern  
483 vaccines based on highly purified antigen induce insufficient immune protection and a  
484 need for natural vaccine adjuvants is continuously growing.

485

### 486 **Acknowledgments**

487 This work was supported by Ministry of Education, Science and Technological  
488 Development of the Republic of Serbia (ON175102 and ON173032) and Ministry of  
489 Defense of the Republic of Serbia (MFVMA/10/13-15).

490

### 491 **Disclosure of interest**

492 The authors declare that there is no conflict of interest.

493

494 **References**

495 **Rivera, A. R. V., Wyneken, J. and Blob, R. W. (2011). Forelimb kinematics and motor**  
496 **patterns of swimming loggerhead sea turtles (*Caretta caretta*): are motor patterns**  
497 **conserved in the evolution of new locomotor strategies? *J. Exp. Biol.* **214**, 3314-3323.**

498 Lin, K.I., Kao, Y.Y., Kuo, H.K., Yang, W.B., Chou, A., Lin, H.H., Yu, A.L., Wong,  
499 C.H. (2006a). Reishi polysaccharides induce immunoglobulin production through the  
500 TLR4/TLR2-mediated induction of transcription factor Blimp-1. *J. Biol. Chem.* **281**,  
501 24111-24123.

- 502 Yuen, J. and Gohel, M. (2008) The dual roles of Ganoderma antioxidants on urothelial  
503 cell DNA under carcinogenic attack. *J. Ethnopharmacol.* **118**, 324-330.
- 504 Wasser, S. (2010) Medicinal mushroom science: history, current status, future trends,  
505 and unsolved problems. *Int. J. Med. Mushrooms.* **12**, 1-16.
- 506 Joseph, S., Sabulal, B., George, V., Antony, K., Janardhanan, K. (2011) Antitumor and  
507 anti-inflammatory activities of polysaccharides isolated from *Ganoderma lucidum*. *Acta.*  
508 *Pharm.* **61**, 335-342.
- 509 Park, Y-J., Kuen, D-S., and Chung, Y. (2018) Future prospects of immune checkpoint  
510 blockade in cancer: from response prediction to overcoming resistance. *Exp. Mol. Med.*  
511 **50**,109.
- 512 Martin, K., Schreiner, J., and Zippelius, A. (2015) Modulation of APC function and  
513 anti-tumor immunity by anti-cancer drugs. *Front. Immunol.* **6**, 501.
- 514 Flaherty, D. (2012) Antigen-Presenting Cells. In: *Immunology for Pharmacy* (ed.  
515 Flaherty DK), pp. 37-44. Elsevier, Inc.
- 516 Clark, G., Angel, N., Kato, M., Lopez, A., MacDonald, K., Vuckovic, S., Hart, D.N.  
517 (2000) The role of dendritic cells in the innate immune system. *Microbes. Infect.* **2**, 257-  
518 272.
- 519 Hirayama, D., Iida, T., Nakase, H. (2018) The phagocytic function of macrophage-  
520 enforcing innate immunity and tissue homeostasis. *Int. J. Mol. Sci.* **19**, 92.
- 521 Kawai, T. and Akira, S. (2009) The roles of TLRs, RLRs and NLRs in pathogen  
522 recognition. *Int. Immunol.* **21**, 317-337.
- 523 Bhardwaj, N., Gnjatic, S., and Sawhney, B. (2010) TLR agonists: Are they good  
524 adjuvants? *Cancer. J.* **16**, 382-391.
- 525 Zheng, R., Cohen, P., Paustian, C., Johnson, T., Lee, W., Shu, S., Koski, G.K. (2008)  
526 Paired toll-like receptor agonists enhance vaccine therapy through induction of interleukin-  
527 12. *Cancer. Res.* **68(11)**, 4045-4049.
- 528 Pi, C.C., Chu, C.L., Lu, C.Y., Zhuang, Y.J., Wang, C.L., Yu, Y.H., Wang, H.Y., Lin,  
529 C.C., Chen, C.J.. (2014) Polysaccharides from *Ganoderma formosanum* function as a Th1  
530 adjuvant and stimulate cytotoxic T cell response *in vivo*. *Vaccine.* **32**, 401-408.

- 531 Ćilerdžić, J., Vukojević, J., Klaus, A., Ivanović, Ž., Blagojević, J., Stajić, M. (2018)  
532 Wheat straw - a promising substrate for *Ganoderma lucidum* cultivation. *Acta Scientiarum.*  
533 *Polonorum. Hortorum. Cultus.* **17(1)**, 13-22.
- 534 Oez, S., Platzer, E., and Welte, K. (1990a) A quantitative colorimetric method to  
535 evaluate the functional state of human polymorphonuclear leukocytes. *Blut.* **60**, 97-102.
- 536 Chen, H.Y., Weng, I.C., Li, C.S., Wan, L., Liu, F.T. (2015) Examination of galectins  
537 in phagocytosis. *Methods. Mol. Biol.* **1207**, 201-213.
- 538 Oez, S., Welte, K., Platzer, E., Kalden, J.R. (1990b) A simple assay for quantifying the  
539 inducible adherence of neutrophils. *Immunobiol.* **180**, 308-315.
- 540 Pick, E., Charon, J., and Mizel, D. (1981) A rapid densitometric microassay for the  
541 nitroblue tetrazolium reduction and application of the microassay to macrophages. *J.*  
542 *Reticuloendothel. Soc.* **30**, 581-593.
- 543 Green, L.C., Wagner, D.A., Glogowski, J., Skipper, P.L., Wishnok, J.S., Tannenbaum,  
544 S.R. (1982) Analysis of nitrate, nitrite, and [15N] in biological fluids. *Anal. Biochem.*  
545 **126(1)**, 131-138.
- 546 Mäkelä, S.M., Strengell, M., Pietilä, T.E., Osterlund, P., Julkunen, I. (2009) Multiple  
547 signaling pathways contribute to synergistic TLR ligand-dependent cytokine gene  
548 expression in human monocyte-derived macrophages and dendritic cells. *J. Leukoc. Biol.*  
549 **85(4)**, 664-672.
- 550 Lin, J.Y., Chen, M.L., and Lin, B.F. (2006b) *Ganoderma tsugae* in vivo modulates  
551 Th1/Th2 and macrophage responses in an allergic murine model. *Food. Chem. Toxicol.* **44**,  
552 2025-2032.
- 553 Boh, B. (2013) *Ganoderma lucidum*: a potential for biotechnological production of  
554 anti-cancer and immunomodulatory drugs. *Recent. Pat. Anticancer. Drug. Discov.* **8**, 255-  
555 287.
- 556 Shi, M., Zhang, Z., and Yang, Y. (2013) Antioxidant and immunoregulatory activity of  
557 *Ganoderma lucidum* polysaccharide (GLP). *Carbohydr. Polym.* **95**, 200-206.
- 558 Liu, Z., Xing, J., Huang, Y., Bo, R., Zheng, S., Luo, L., Niu, Y., Zhang, Y., Hu,  
559 Y., Liu, J., et al. (2016a) Activation effect of *Ganoderma lucidum* polysaccharides  
560 liposomes on murine peritoneal macrophages. *Int. J. Biol. Macromol.* **82**, 973-978.

- 561 Liu, Z., Xing, J., Zheng, S., Bo, R., Luo, L., Huang, Y., Niu, Y., Li, Z., Wang, D., Hu,  
562 Y., et al. (2016b) *Ganoderma lucidum* polysaccharides encapsulated in liposome as an  
563 adjuvant to promote Th-1 bias immune response. *Carbohydr. Polym.* **142**, 141-148.
- 564 Brakhage, A.A. and Schroeckh, V. (2011) Fungal secondary metabolites - strategies to  
565 activate silent gene clusters. *Fungal. Genet. Biol.* **48(1)**, 15-22.
- 566 Jung da, H., Kim, K.H., Byeon, H.E., Park, H.J., Park, B., Rhee, D.K., Um, S.H., Pyo,  
567 S. (2015) Involvement of ATF3 in the negative regulation of iNOS expression and NO  
568 production in activated macrophages. *Immunol. Res.* **62(1)**, 35-45.
- 569 Ampem, G., Azegrouz, H., Bacsadi, Á., Balogh, L., Schmidt, S., Thuróczy, J. Röszer,  
570 T. (2016) Adipose tissue macrophages in non-rodent mammals: a comparative study. *Cell.*  
571 *Tissue. Res.* **363(2)**, 461-478.
- 572 Da Silva, N., Barton, C.R. (2016) Macrophages and dendritic cells in the post-  
573 testicular environment. *Cell. Tissue. Res.* **363(1)**, 97-104.
- 574 Lawrence, T. and Natoli, G. (2011) Transcriptional regulation of macrophage  
575 polarization: enabling diversity with identity. *Nat. Rev. Immunol.* **11(11)**, 750-761.
- 576 Murray, P.J., and Wynn, T.A. (2011) Obstacles and opportunities for understanding  
577 macrophage polarization. *J. Leukoc. Biol.* **89(4)**, 557-563.
- 578 Guo, L., Xie, J., Ruan, Y., Zhou, L., Zhu, H., Yun, X., Jiang, Y., Lü, L., Chen,  
579 K., Min, Z., et al. (2009) Characterization and immunostimulatory activity of a  
580 polysaccharide from the spores of *Ganoderma lucidum*. *Int. Immunopharmacol.* **9**, 1175-  
581 1182.
- 582 Chen, Y., Zhang, H., Wang, Y., Nie, S., Li, C., Xie, M. (2014) Acetylation and  
583 carboxymethylation of the polysaccharide from *Ganoderma atrum* and their antioxidant  
584 and immunomodulating activities. *Food. Chem.* **156**, 279-288.
- 585 Yu, Q., Nie, S.P., Wang, J.Q., Yin, P.F., Huang, D.F., Li, W.J., Xie, M.Y. (2014) Toll-  
586 like receptor 4-mediated ROS signaling pathway involved in *Ganoderma atrum*  
587 polysaccharide-induced tumor necrosis factor- $\alpha$  secretion during macrophage activation.  
588 *Food. Chem. Toxicol.* **66**, 14-22.
- 589 Li, W.J., Li, L., Zhen, W.Y., Wang, L.F., Pan, M., Lv, J.Q., Wang, F., Yao, Y.F., Nie,  
590 S.P., Xie, M.Y. (2017) *Ganoderma atrum* polysaccharide ameliorates ROS generation and

591 apoptosis in spleen and thymus of immunosuppressed mice. *Food. Chem. Toxicol.* **99**, 199-  
592 208.

593 Shapouri-Moghaddam, A., Mohammadian, S., Vazini, H., Taghadosi, M., Esmaeili,  
594 S.A., Mardani, F., Seifi, B., Mohammadi, A., Afshari, J.T., Sahebkar, A. (2018)  
595 Macrophage plasticity, polarization, and function in health and disease. *J. Cell.*  
596 *Physiol.* **233(9)**, 6425-6440.

597 Atri, C., Guerfali, F., and Laouini, D. (2018) Role of Human Macrophage Polarization  
598 in Inflammation during Infectious Diseases. *Int. J. Mol. Sci.* **19(6)**: pii: E1801. doi:  
599 10.3390/ijms19061801.

600 Kim, H.S., Kim, Y.J., Lee, H.K., Ryu, H.S., Kim, J.S., Yoon, M.J., Kang, J.S., Hong,  
601 J.T., Kim, Y., Han, S.B. (2012) Activation of macrophages by polysaccharide isolated from  
602 *Paecilomyces cicadae* through toll-like receptor 4. *Food. Chem. Toxicol.* **50(9)**, 3190-3197.

603 Zhang, S., Nie, S., Huang, D., Huang, J., Feng, Y., Xie, M. (2014) A polysaccharide  
604 from *Ganoderma atrum* inhibits tumor growth by induction of apoptosis and activation of  
605 immune response in CT26-bearing mice. *J. Agric. Food. Chem.* **62(38)**, 9296-9304.

606 Abbas, A., Lichtman, A., and Pillai, S. (2017) Cellular and molecular immunology.  
607 9th ed. Elsevier.

608 Prechtel, A.T., Turza, N.M., Theodoridis, A.A., Steinkasserer, A. (2007) CD83  
609 knockdown in monocyte-derived dendritic cells by small interfering RNA leads to a  
610 diminished T cell stimulation. *J. Immunol.* **178(9)**, 5454-5464.

611 Jeannin, P., Magistrelli, G., Aubry, J.P., Caron, G., Gauchat, J.F., Renno, T., Herbault,  
612 N., Goetsch, L., Blaecke, A., Dietrich, P.Y., et al. (2000) Soluble CD86 is a costimulatory  
613 molecule for human T lymphocytes. *Immunity.* **13(3)**, 303-312.

614 Sheikh, N.A. and Jones, L.A. (2008) CD54 is a surrogate marker of antigen presenting  
615 cell activation. *Cancer. Immunol. Immunother.* **57(9)**, 1381-1390.

616 Cella, M., Salio, M., Sakakibara, Y., Langen, H., Julkunen, I., Lanzavecchia, A. (1999)  
617 Maturation, activation, and protection of dendritic cells induced by double-stranded RNA.  
618 *J. Exp. Med.* **189(5)**, 821-829.



619 Zobywalski, A., Javorovic, M., Frankenberger, B., Pohla, H., Kremmer, E., Bigalke,  
620 I., Schendel, D.J. (2007) Generation of clinical grade dendritic cells with capacity to  
621 produce biologically active IL-12p70. *J. Transl. Med.* **5**, 18.

622 Rouas, R., Lewalle, P., El Ouriaghli, F., Nowak, B., Duvillier, H., Martiat, P. (2004)  
623 Poly(I:C) used for human dendritic cell maturation preserves their ability to secondarily  
624 secrete bioactive IL-12. *Int. Immunol.* **16(5)**,767-773.

625 Smits, H.H., Engering, A., van der Kleij, D., de Jong, E.C., Schipper, K., van Capel,  
626 T.M., Zaat, B.A., Yazdanbakhsh, M., Wierenga, E.A., van Kooyk, Y., et al. (2005)  
627 Selective probiotic bacteria induce IL-10-producing regulatory T cells in vitro by  
628 modulating dendritic cell function through dendritic cell-specific intercellular adhesion  
629 molecule 3-grabbing nonintegrin. *J. Allergy. Clin. Immunol.* **115(6)**,1260-1267.

630 Saraiva, M., Christensen, J.R., Veldhoen, M., Murphy, T.L., Murphy, K.M., O'Garra,  
631 A. (2009) Interleukin-10 production by Th1 cells requires interleukin-12-induced STAT4  
632 transcription factor and ERK MAP kinase activation by high antigen dose. *Immunity.*  
633 **31(2)**, 209-219.

634 Glimcher, L. and Kenneth, M. (2000) Murphy3 Lineage commitment in the immune  
635 system: the T helper lymphocyte grows up. *Genes. Dev.* **14**, 1693-1711.

636 Ćilerdžić, J., Sofrenić, I., Tešević, V., Brčeski, I., Duletić-Laušević, S., Vukojević, J.,  
637 Stajić, M. (2018) Neuroprotective potential and chemical profile of alternatively cultivated  
638 *Ganoderma lucidum* basidiocarps. *Chem. Biodivers.* **15(5)**, DOI: 10.1002/cbdv.201800036.

639

640 **Legends of Figures**

641 **Fig. 1.** Effect of *Ganoderma lucidum* extracts on metabolic activity/viability of PMs

642

643 **Fig. 2.** Effect of *Ganoderma lucidum* extracts on adhesive capability of PMs

644

645 **Fig. 3.** Effect of *Ganoderma lucidum* extracts on phagocytic activity of LPS-stimulated  
646 PMs

647

648 **Fig. 4.** Effect of *Ganoderma lucidum* extracts on ROS production by LPS-stimulated  
649 PMs

650

651 **Fig. 5.** Effect of *Ganoderma lucidum* extracts on NO production by PMs

652

653 **Fig. 6.** Effect of *Ganoderma lucidum* extracts on phenotype (**A**) and cytokine production  
654 (**B**) by MoDCs

655 *Phenotypic characteristics of MoDC. MoDC were obtained by cultivation of human*  
656 *monocytes for 6 days with GM-CSF (100.0 ng/mL) and IL-4 (20.0 ng/mL) and then*  
657 *stimulated with Poly (I:C) (10.0 µg/mL), Loxoribine (34.0 µg/mL) and GC/GA (100.0*  
658 *µg/mL). Non-adherent cells were collected and stained for key DC markers using MAb*  
659 *(anti-HLA-DR – PE, CD86 – PE, CD83 – FITC, CD40 – FITC, CD54 – PE and CCR7 –*  
660 *FITC) and analyzed by flow cytometry. Results are presented as over-laid histograms*  
661 *within the gated population of one experiment. These data are representative of three*  
662 *independent experiments. Red and Blue line for MoDC TLR3/7 + GA, Full gray*  
663 *histogram for MoDC TLR3/7.*

664

665 **Fig. 7.** Effect of *Ganoderma lucidum* extracts on alostimulatory (**A**) and Th polarization  
666 capacity (**B**) of MoDCs

667 *These data are representative of three independent experiments.*

668

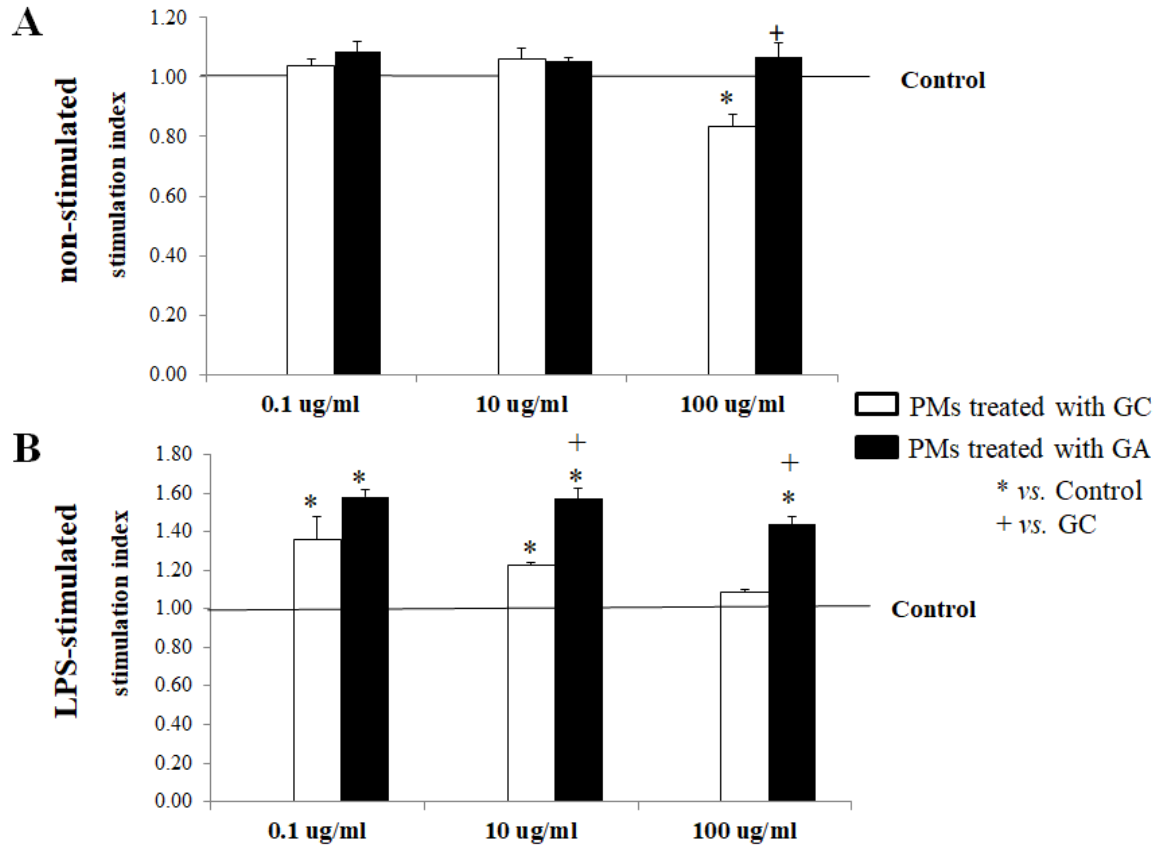

669

670 Fig.1

671

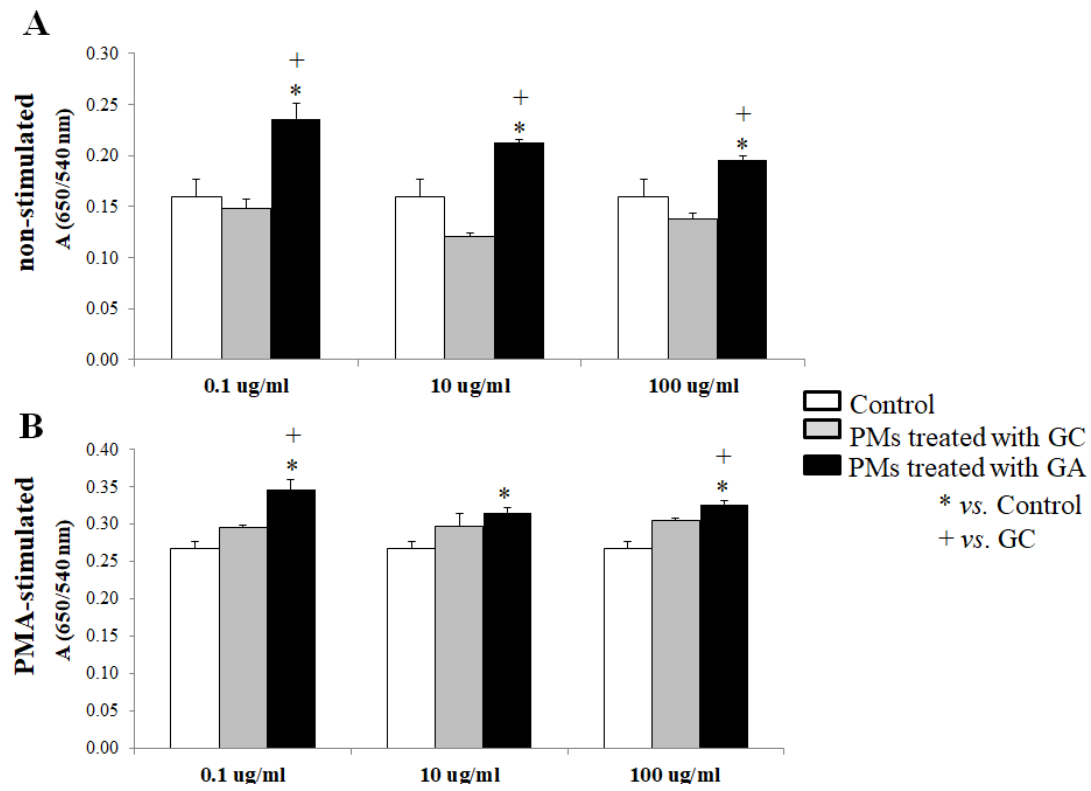

672

673 Fig 2.

674

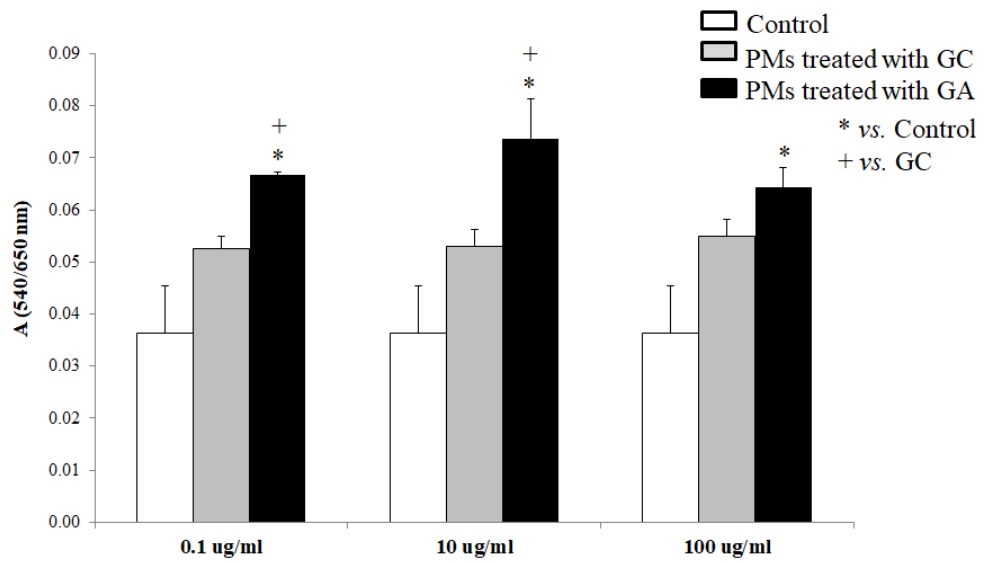

675

676 Fig 3.

677

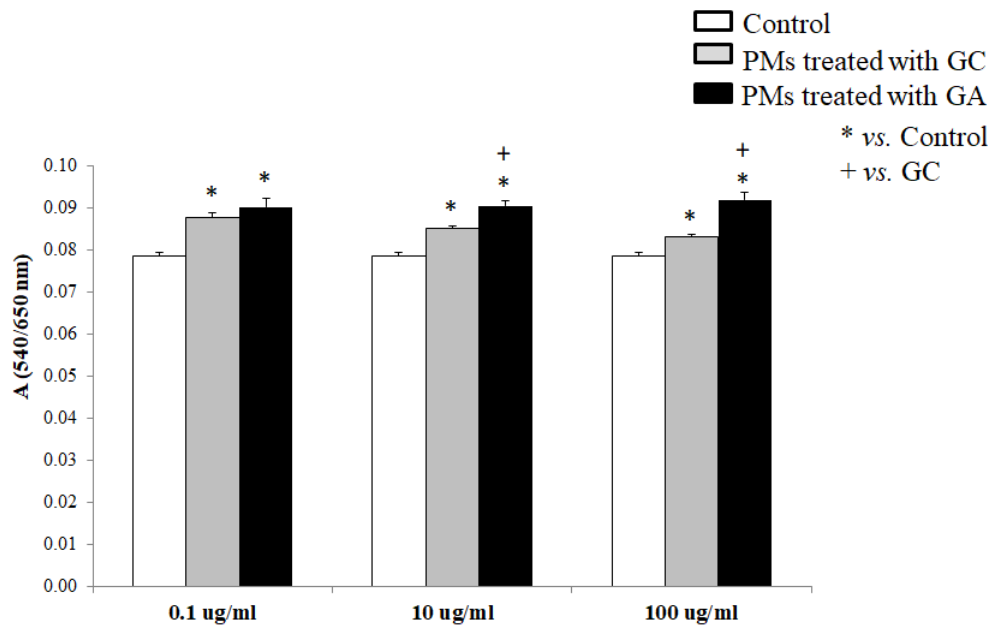

678

679 Fig 4.

680

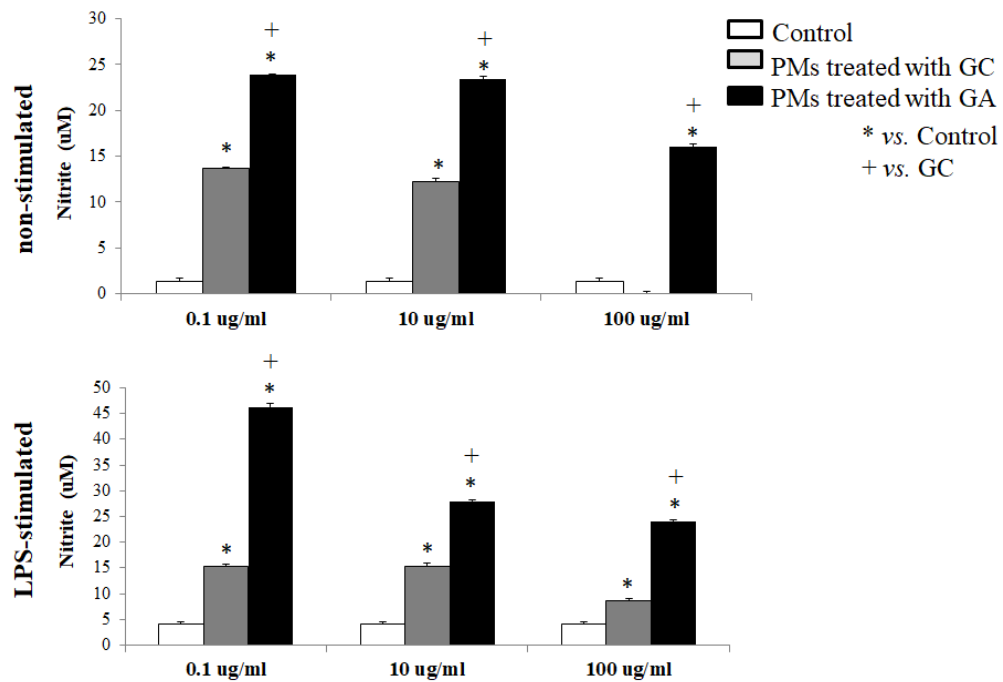

681

682 Fig 5.

683



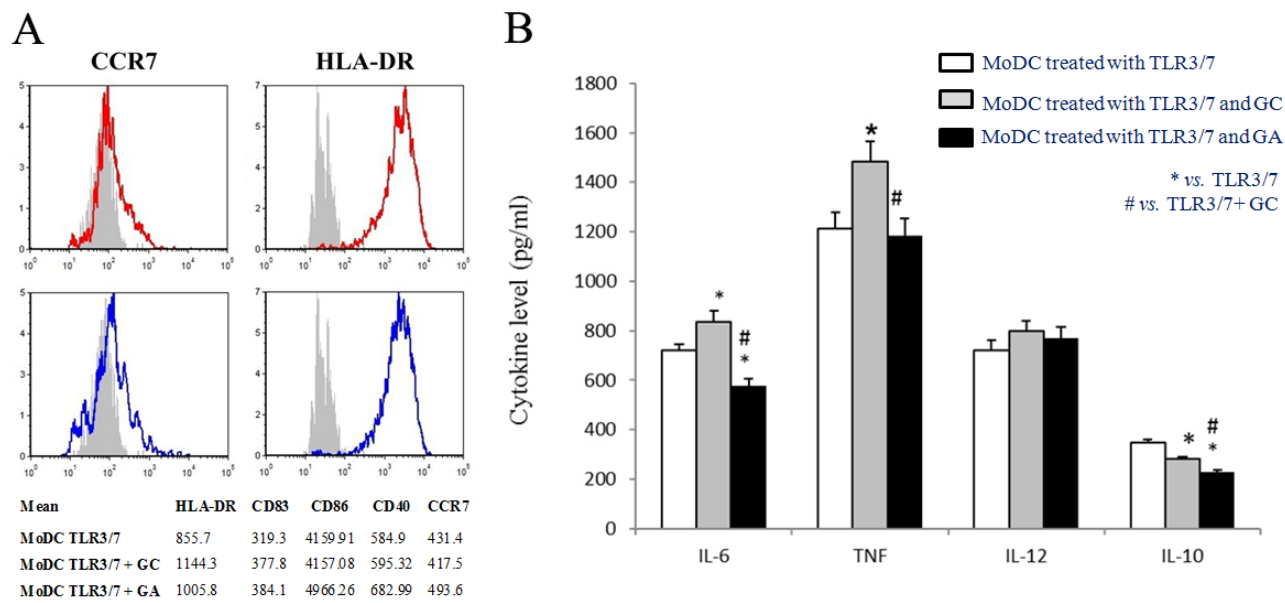

684

685 Fig 6.

686

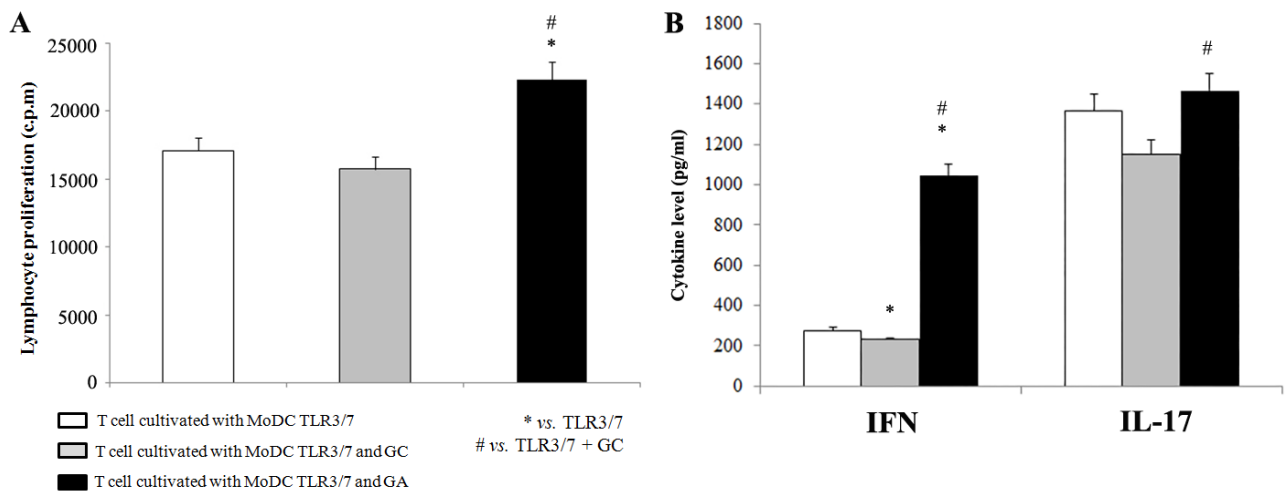

687

688 Fig 7.
